# Supplementary material
Source: Elsevier journal article supplement (https://www.sciencedirect.com/science/article/pii/S2255553617301829)
Supplement: mmc1 [file S2255553617301829:mmc1.doc]

**Figure S1.** Linear regression of RBC, HGB, and TBIL with standardized SBP. The fitted lines were estimated along with a 95% confidence interval. HGB, hemoglobin; RBC, red blood cell count; SBP, systolic blood pressure; TBIL, total bilirubin.

**
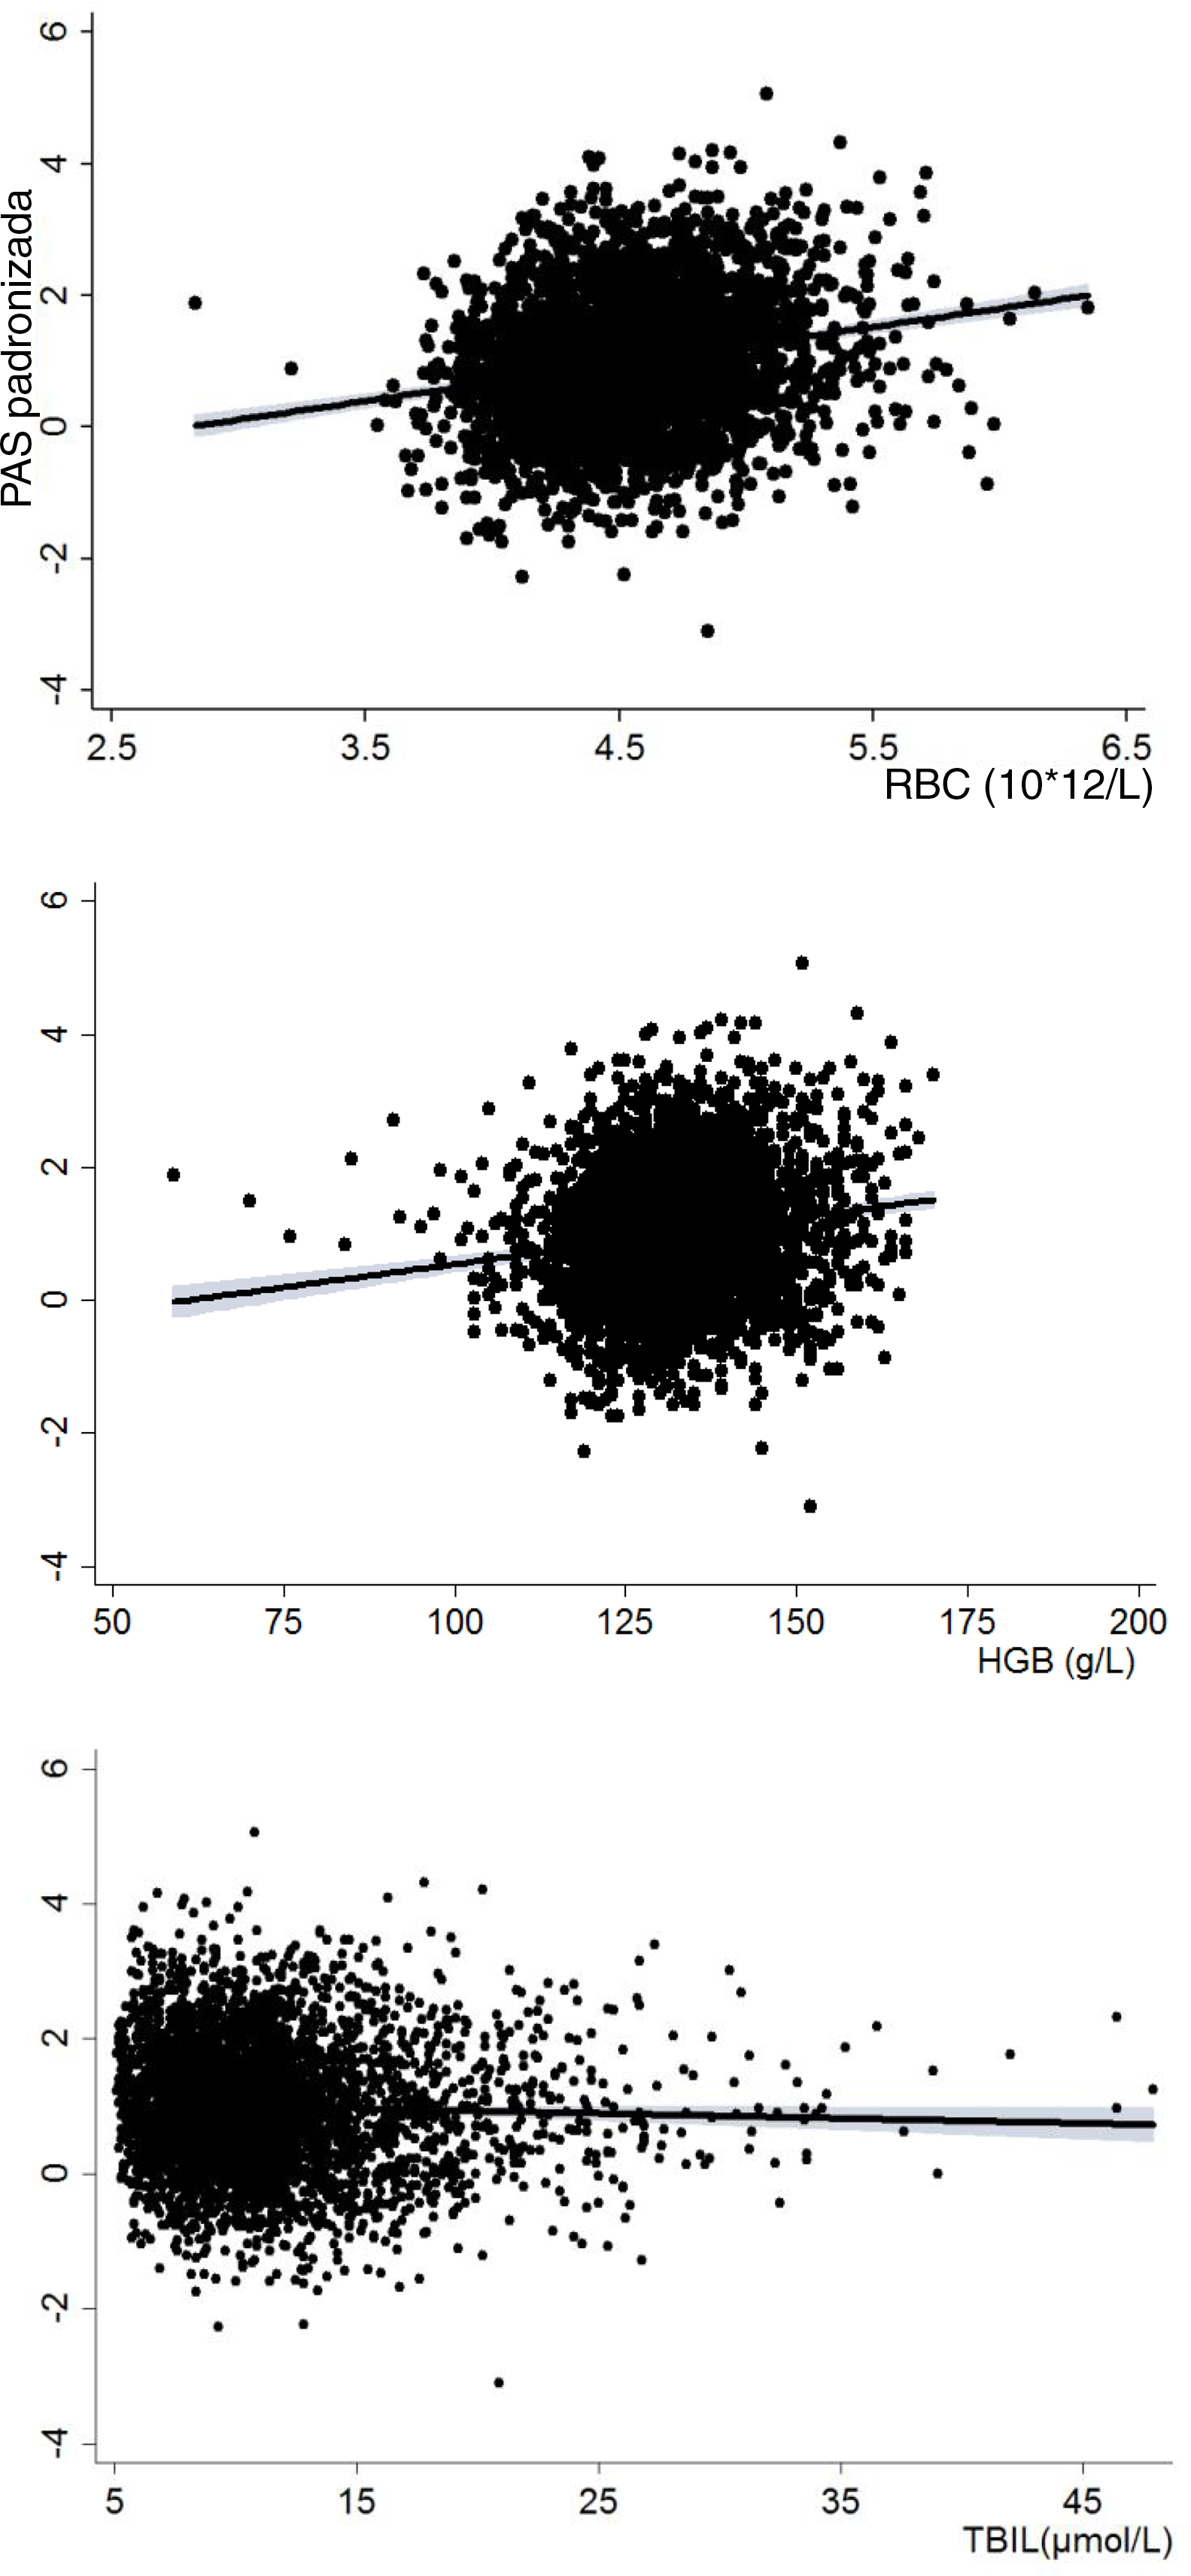
**

**Figure S2.** Linear regression of RBC, HGB, and TBIL with standardized DBP. The fitted lines were estimated along with a 95% confidence interval. HGB, hemoglobin; RBC, red blood cell count; DBP, diastolic blood pressure; TBIL, total bilirubin.

**
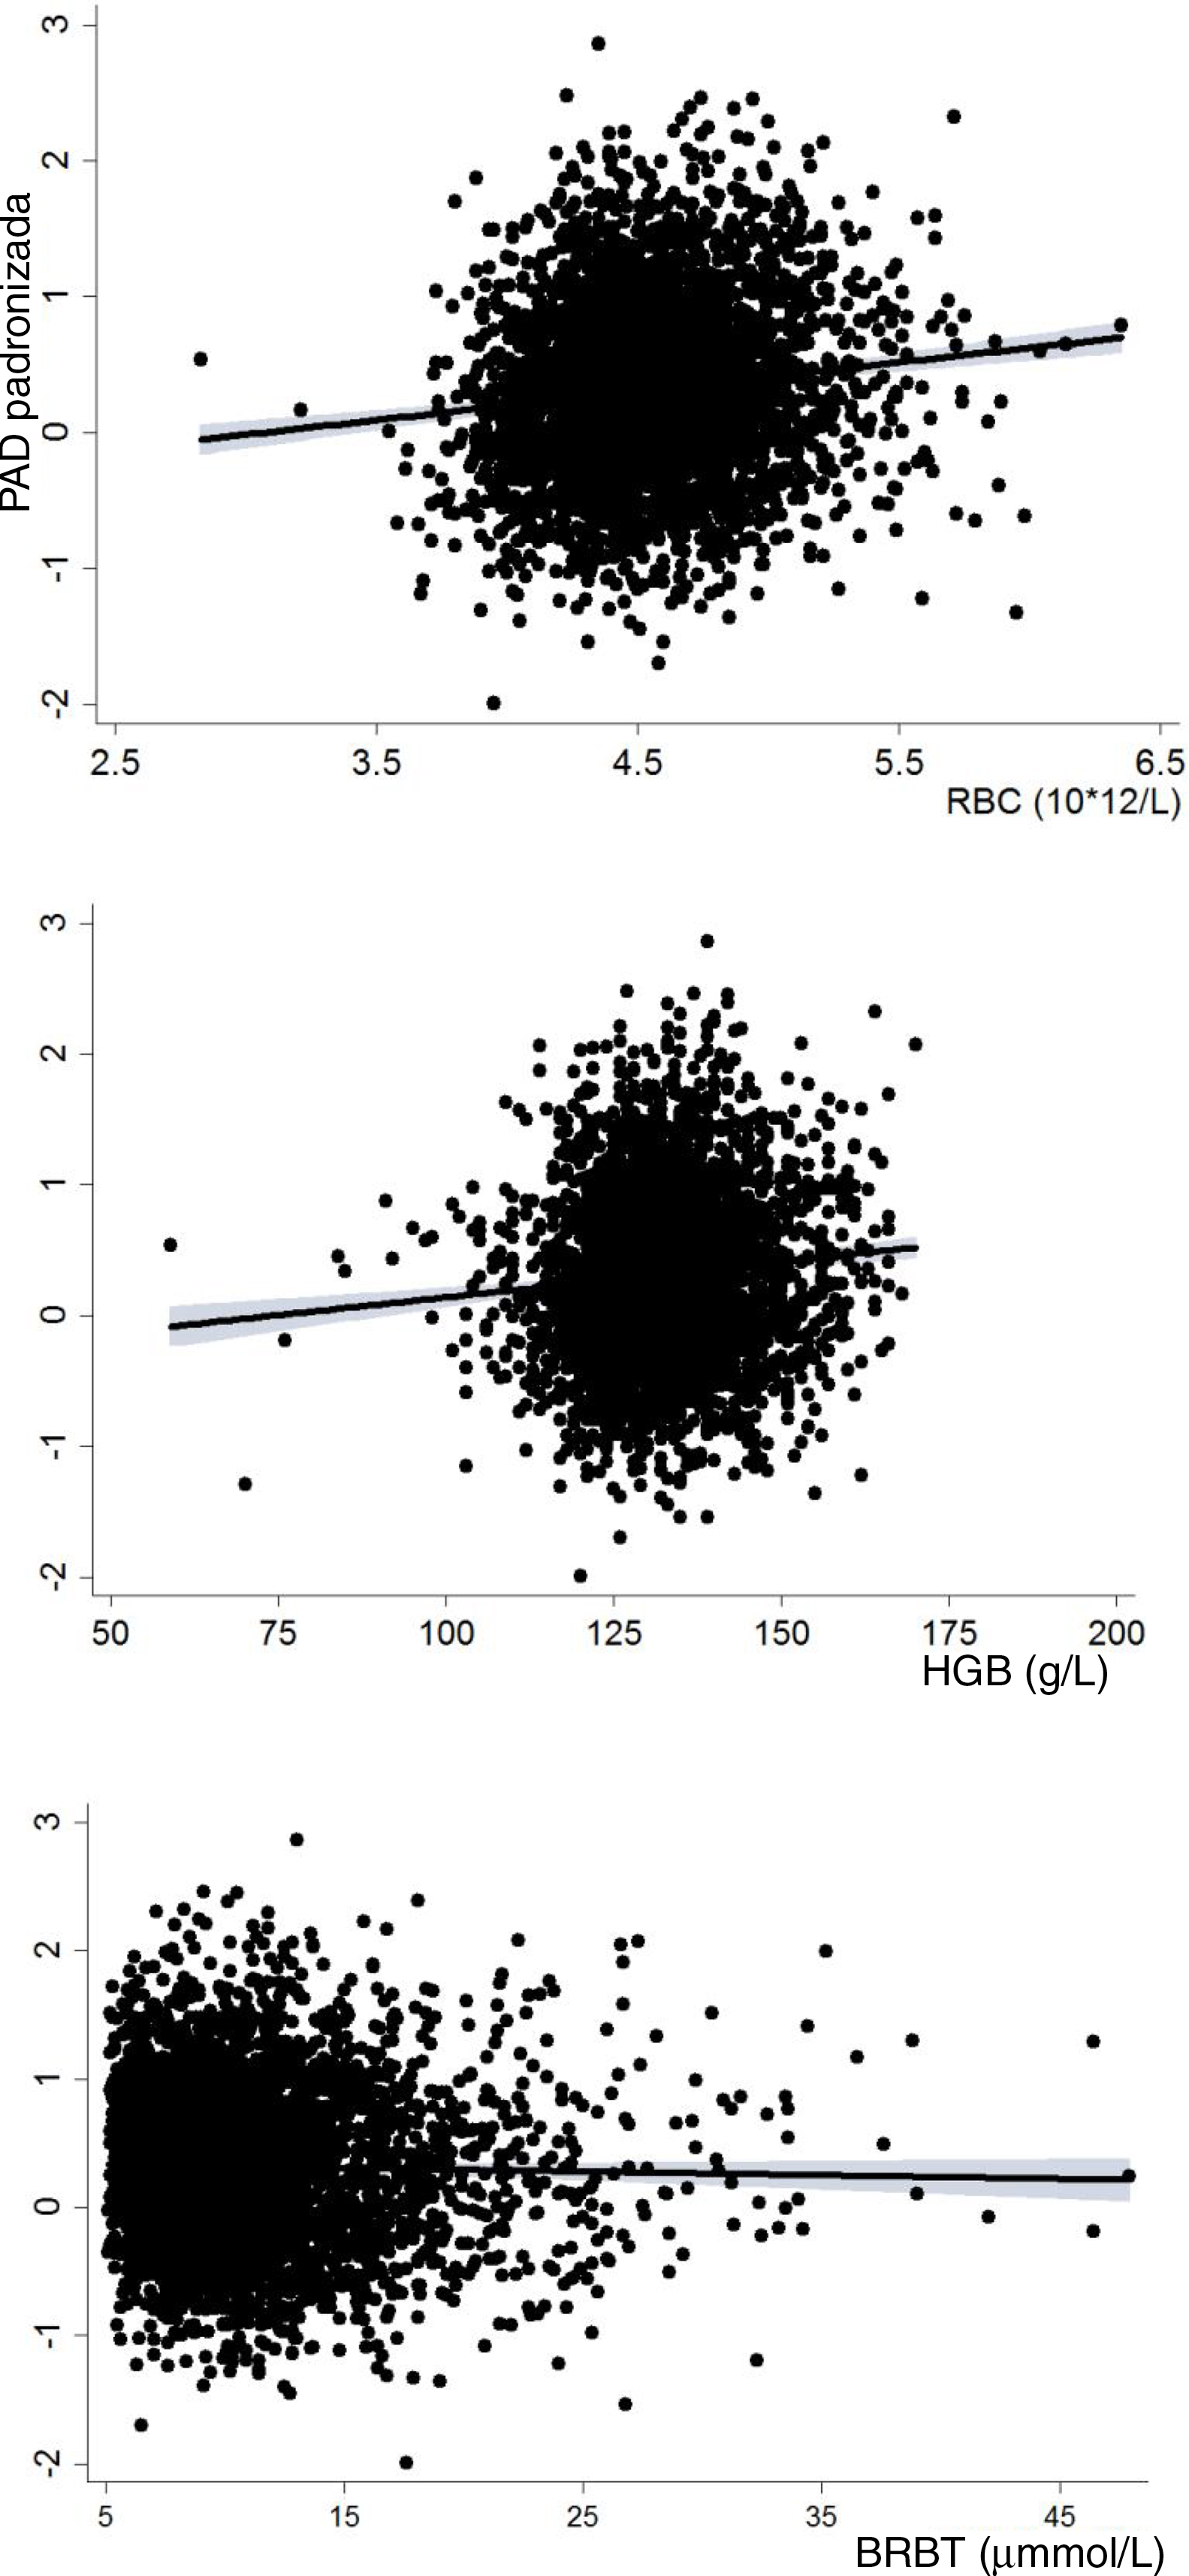
**

**Figure S3.** Partial correlation analysis of SBP and DBP with peripheral TBIL in all age groups. The legends of squares and triangles represent the correlation coefficients (r values) and p-values of SBP and DBP z-score with peripheral TBIL in boys and girls, respectively.

**
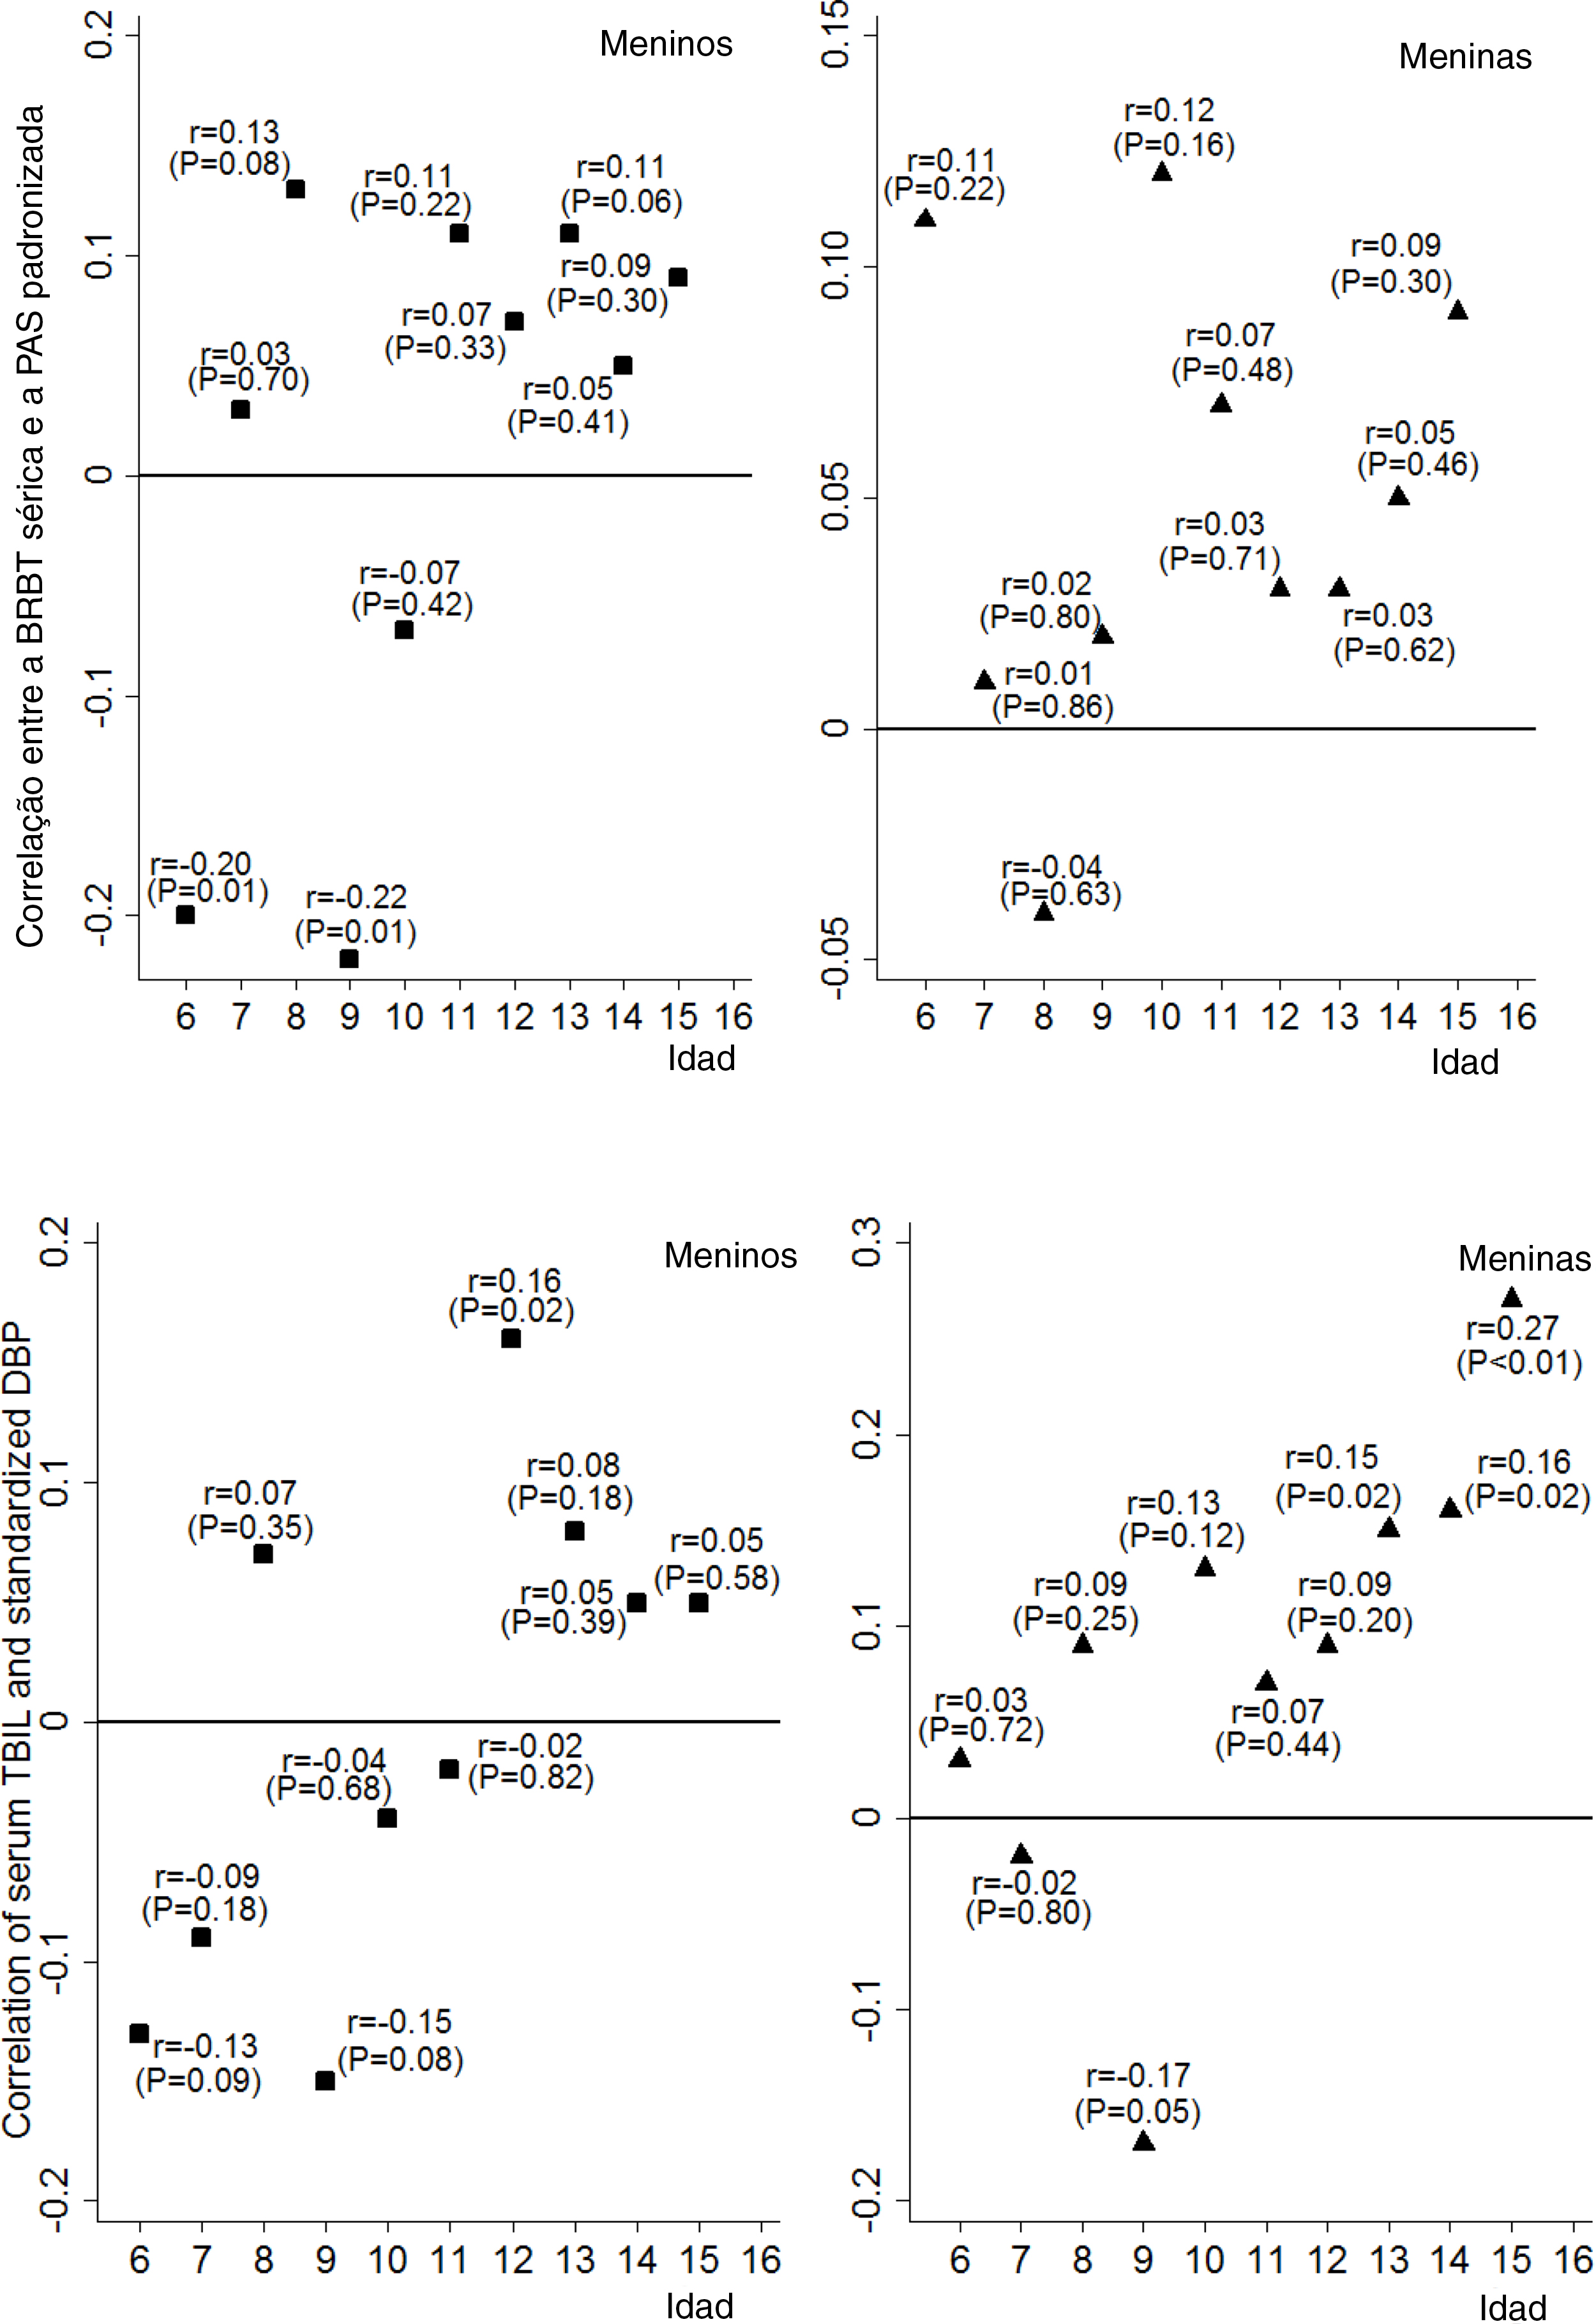
**

**Figure S4.** Partial correlation analysis of SBP and DBP with RBC in all age groups. The legends of squares and triangles represent the correlation coefficients (r values) and p-values of SBP and DBP z-score with RBC in boys and girls, respectively.

**
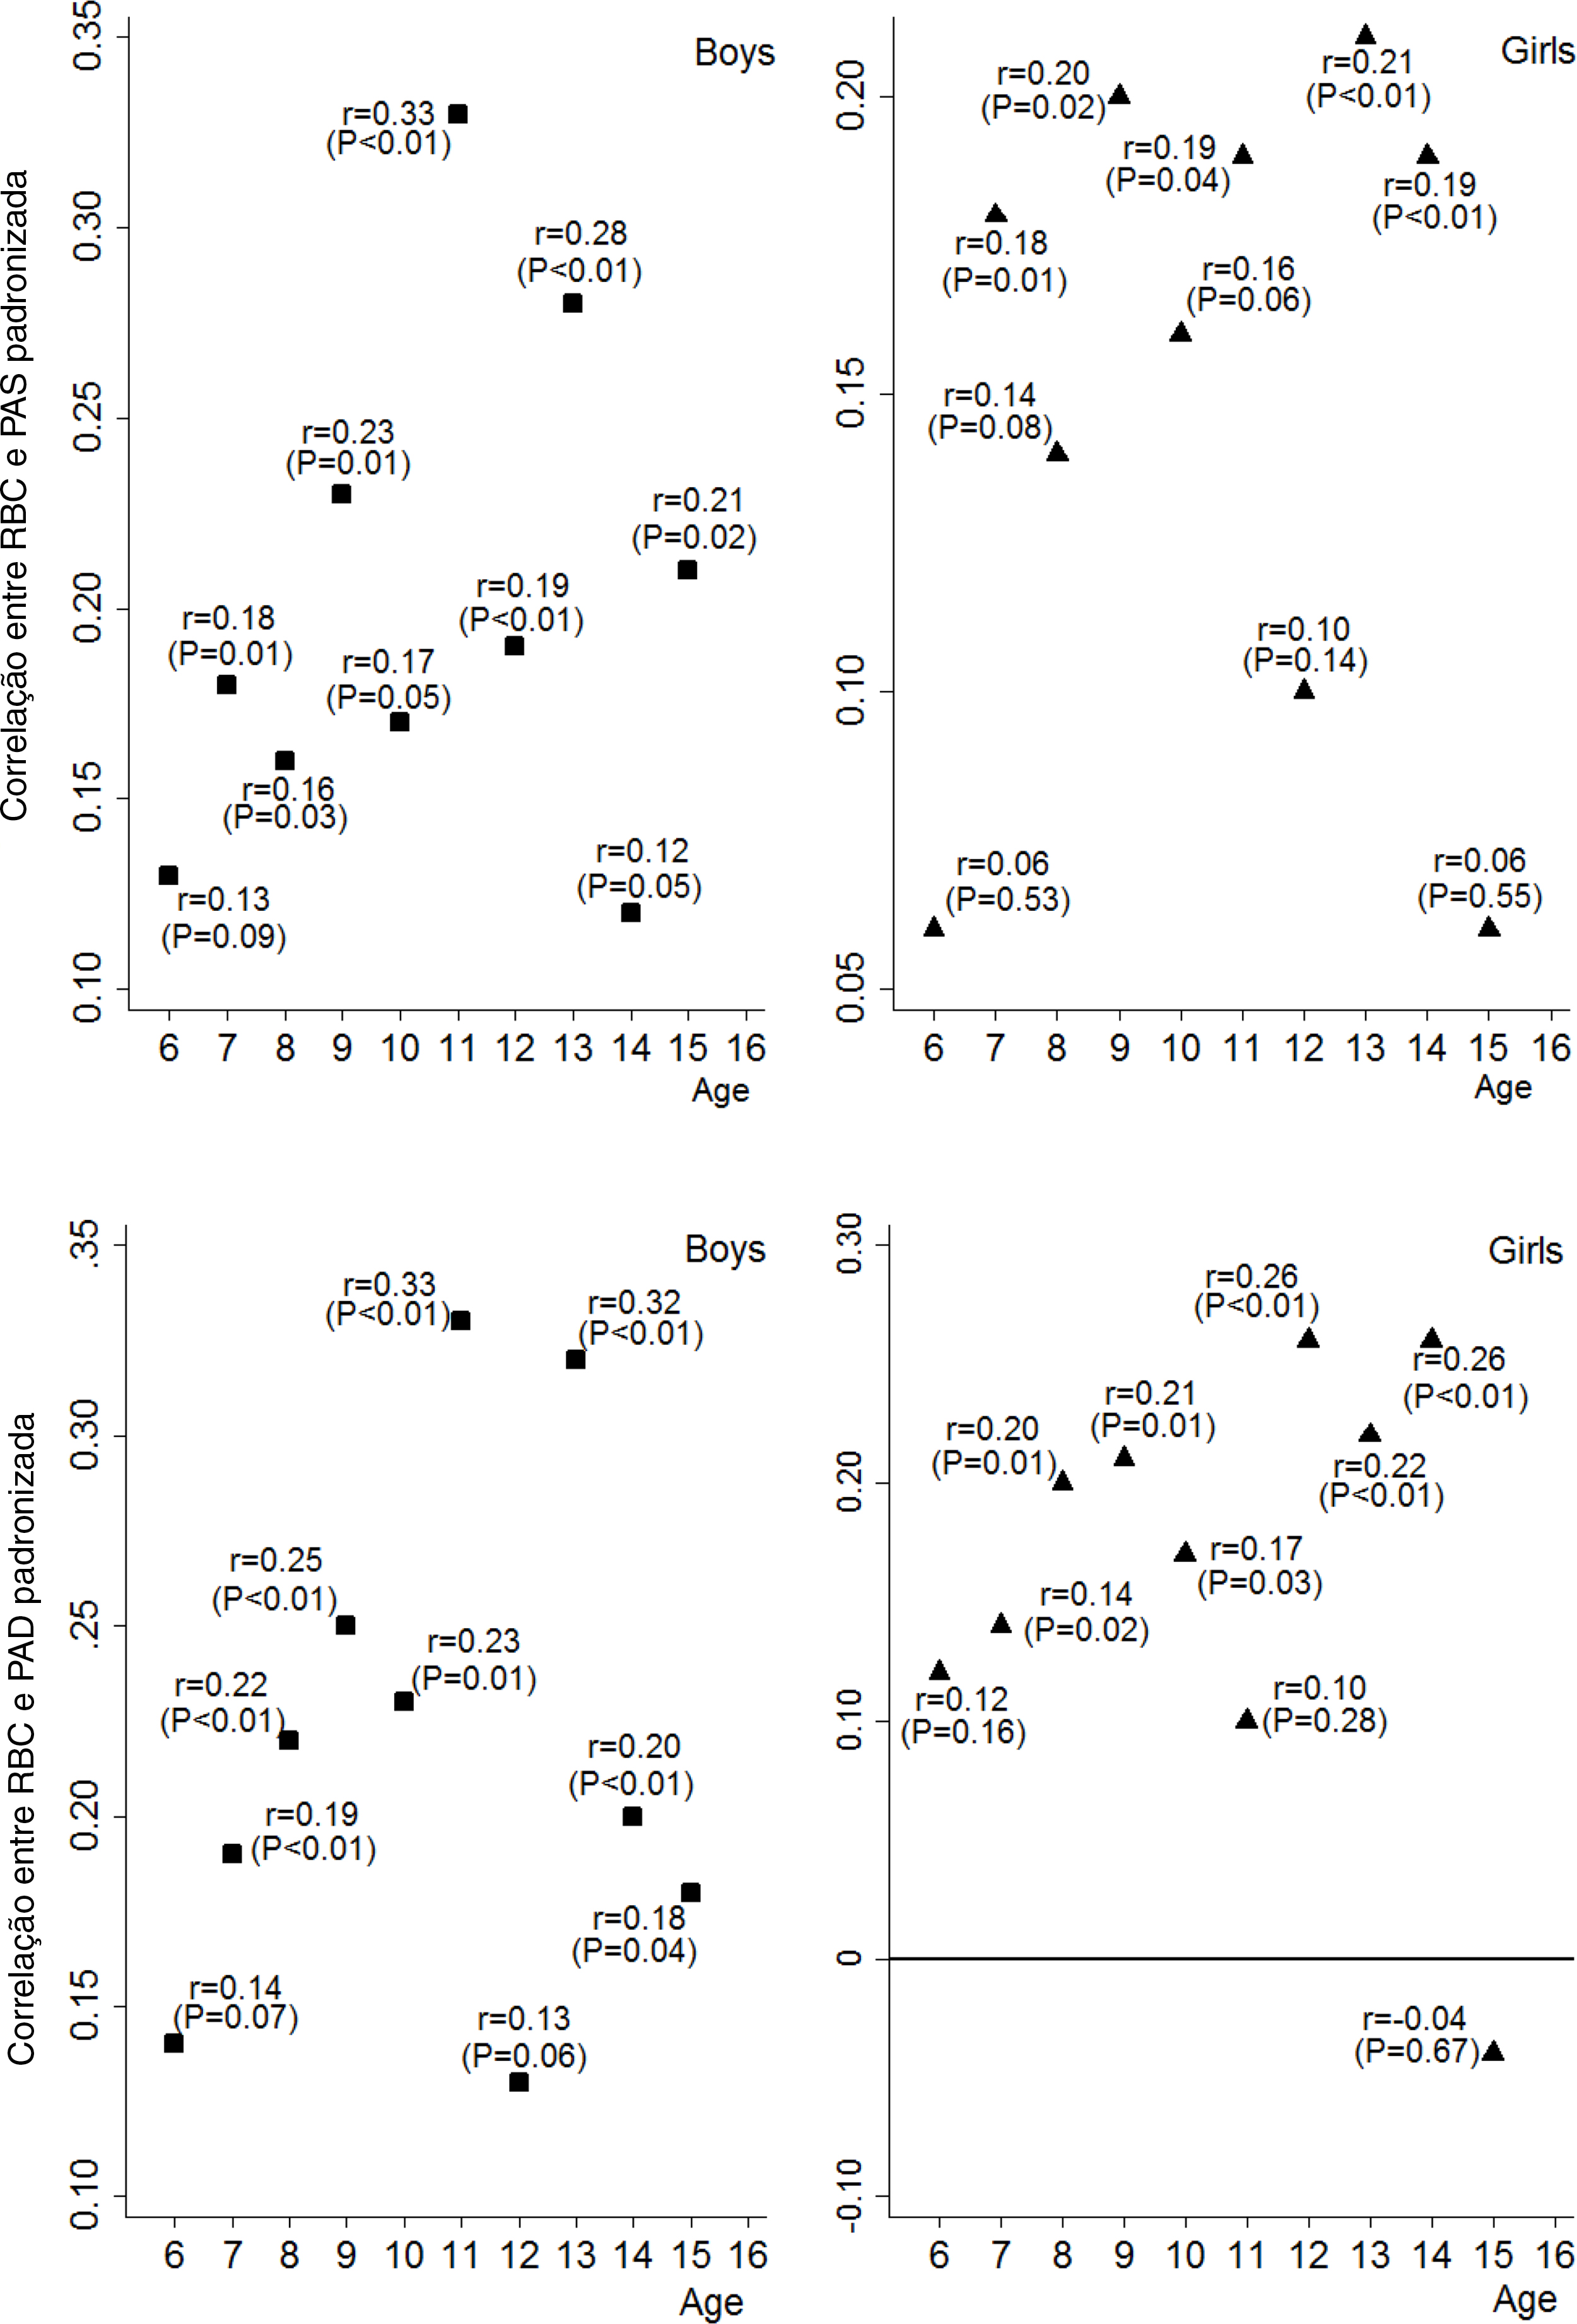
**

**Figure S5.** Partial correlation analysis of SBP and DBP with HGB in all age groups. The legends of squares and triangles represent the correlation coefficients (r values) and p-values of SBP and DBP with HGB in boys and girls, respectively.

**
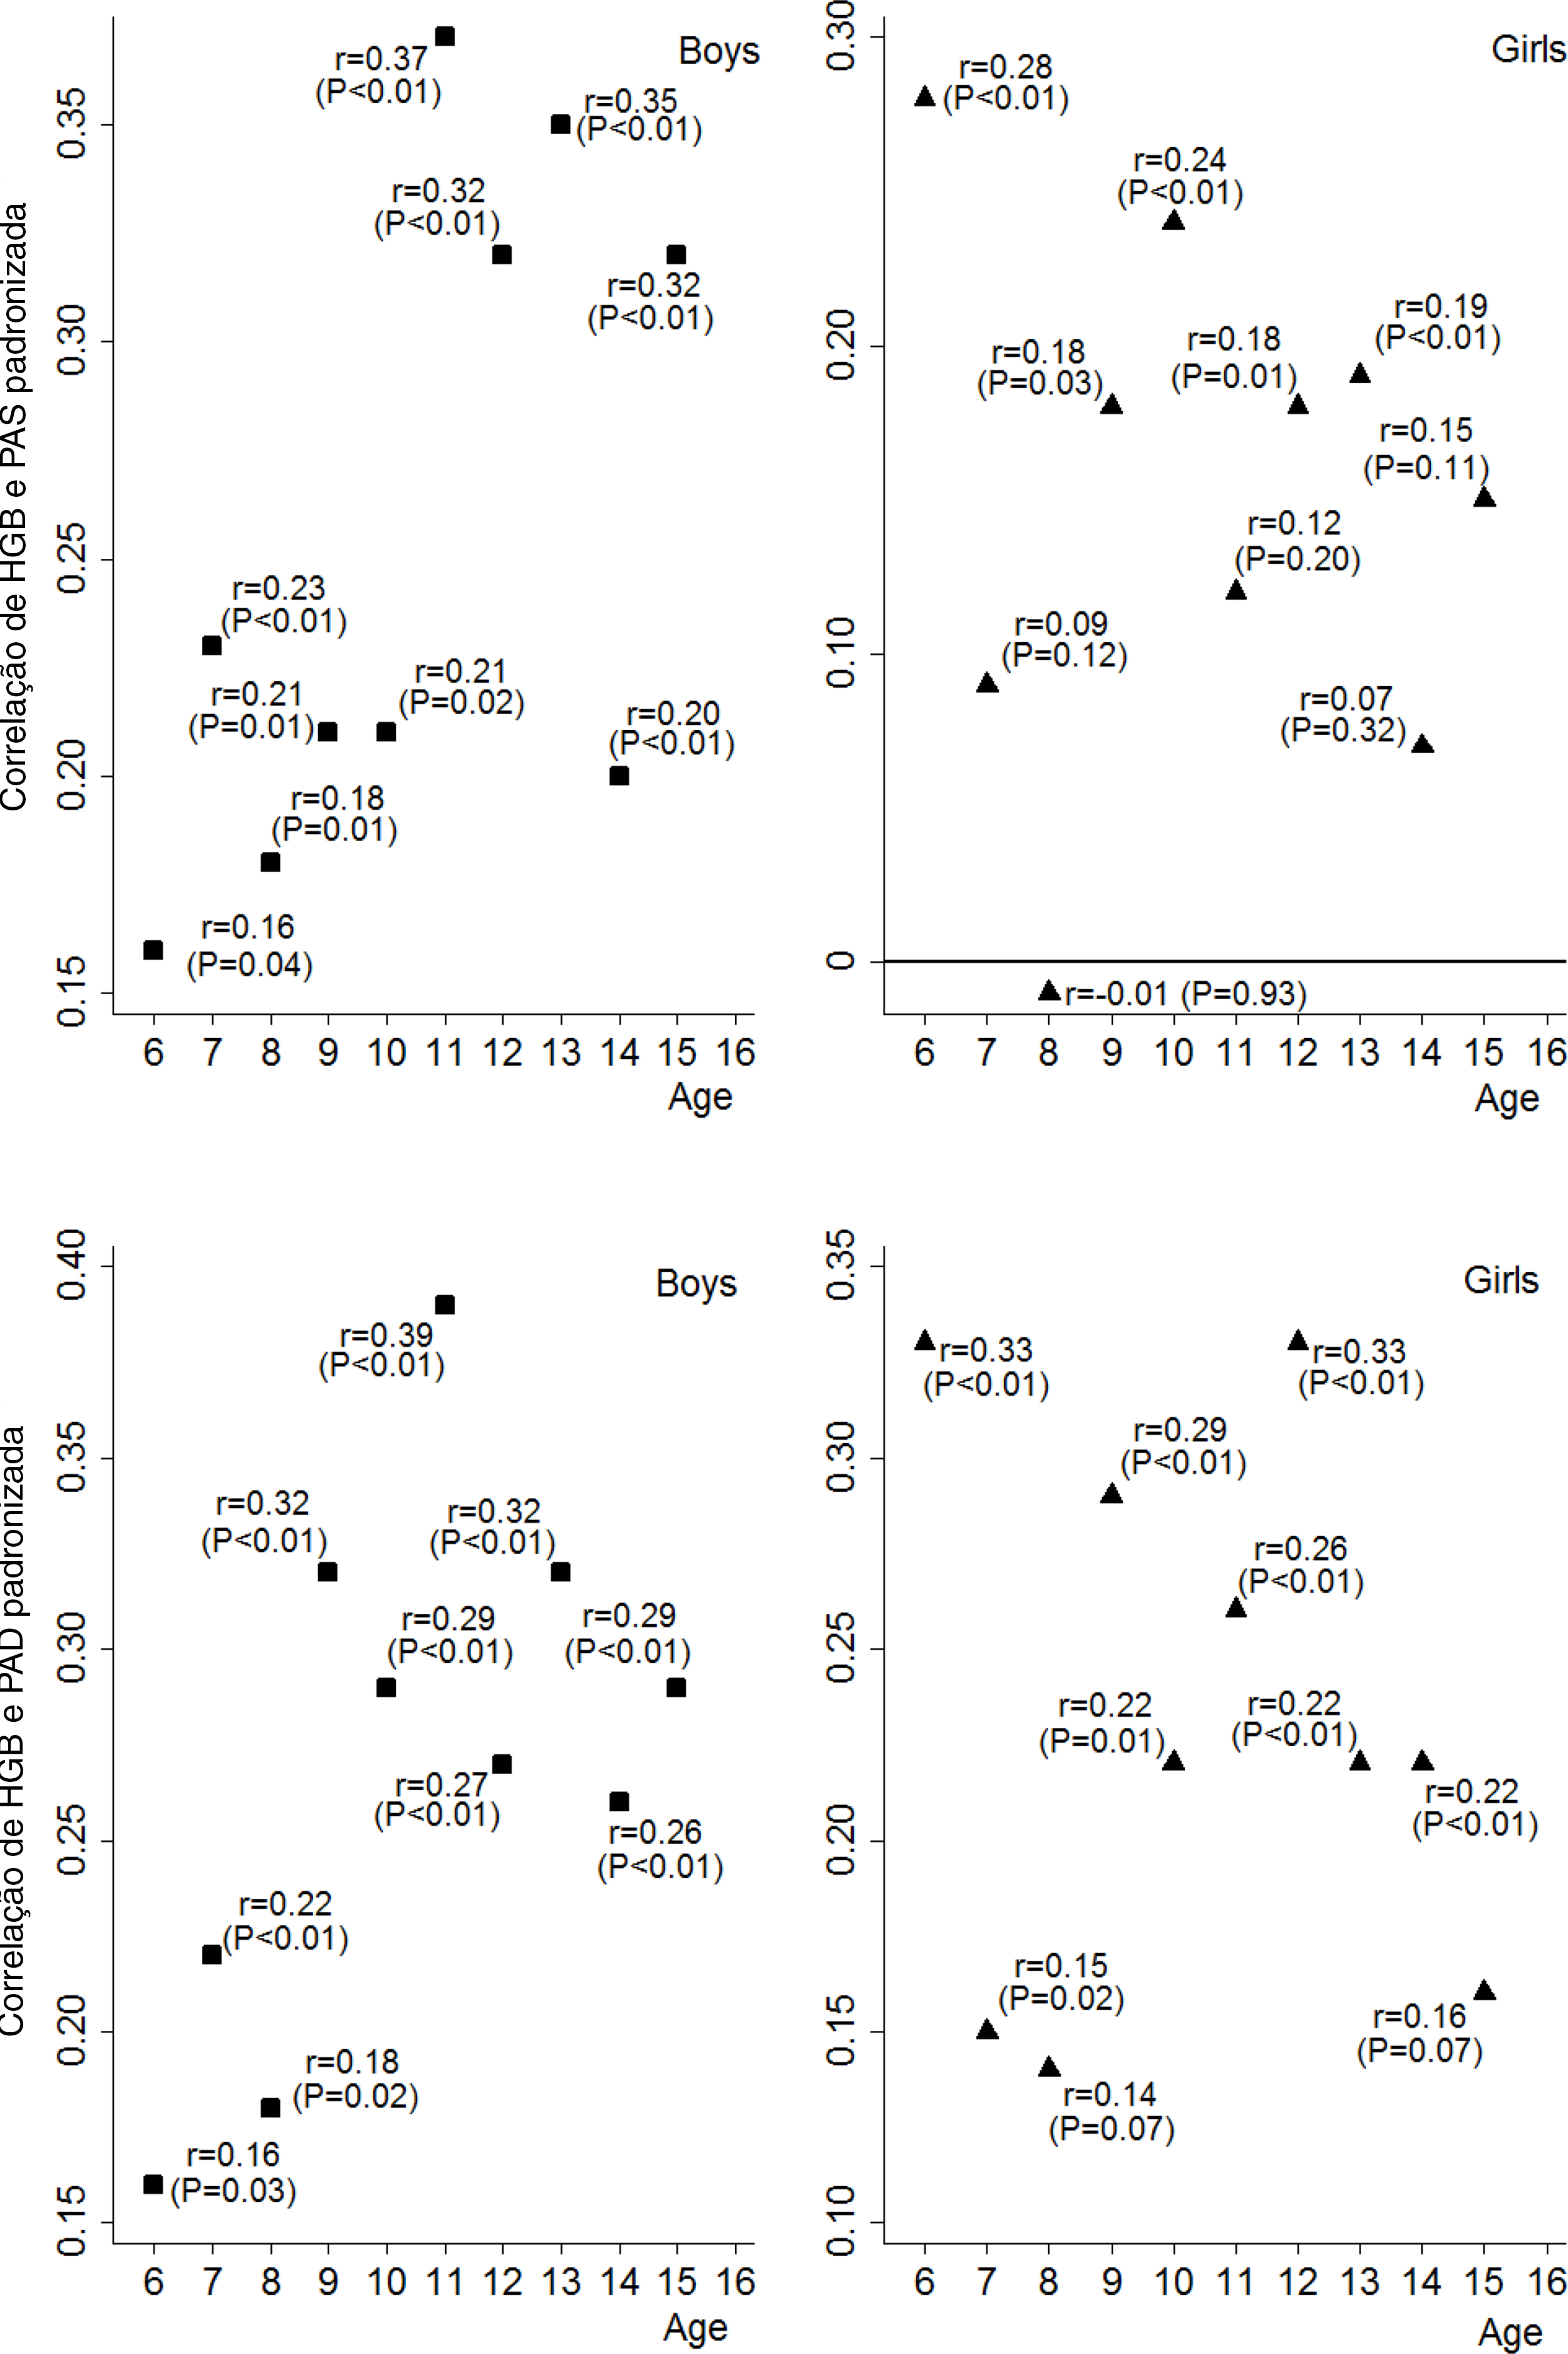
**
